# Supplementary material
Source: publisher site journal article supplement (https://www.dovepress.com/article/565380)
Supplement: Supplementary file 1 [file Supplementary%20Table%20S1.doc]

**Table S1 Characteristics of Participants in Qualitative Study**

| **No.** | Gender | Age (years) | Education | Length of employment (months) | Current Department | Employment Type |
| --- | --- | --- | --- | --- | --- | --- |
| P1 | Female | 22 | Bachelor | 9 | Department of Cardiothoracic & Vascular Intervention | Contract |
| P2 | Female | 23 | Bachelor | 1 | Department of Neurology | Contract |
| P3 | Female | 23 | Bachelor | 9 | Department of Neurosurgery | Contract |
| P4 | Male | 24 | Bachelor | 9 | Intensive Care Unit | Contract |
| P5 | Female | 23 | Bachelor | 8 | Department of Respiratory Medicine | Contract |
| P6 | Female | 27 | Master | 6 | Operating Room | Permanent |
| P7 | Female | 23 | Bachelor | 5 | Department of Orthopedics | Contract |
| P8 | Female | 24 | Bachelor | 9 | Division of Cardiovascular Medicine | Contract |
| P9 | Female | 22 | Bachelor | 3 | Department of Respiratory Medicine | Contract |
| P10 | Female | 23 | Bachelor | 10 | Department of Urology | Contract |
| P11 | Female | 24 | Bachelor | 8 | Department of Gynecology | Contract |
